# Supplementary material for: 7-ketocholesterol and 27-hydroxycholesterol decreased doxorubicin sensitivity in breast cancer cells: estrogenic activity and mTOR pathway
Source: PubMed Central journal article supplement (PMC5630390; doi:10.18632/oncotarget.19789), 2017-08-02
Supplement: oncotarget-08-66033-s001.pdf [file oncotarget-08-66033-s001.pdf]

## 7-ketocholesterol and 27-hydroxycholesterol decreased doxorubicin sensitivity in breast cancer cells: estrogenic activity and mTOR pathway

### SUPPLEMENTARY MATERIALS

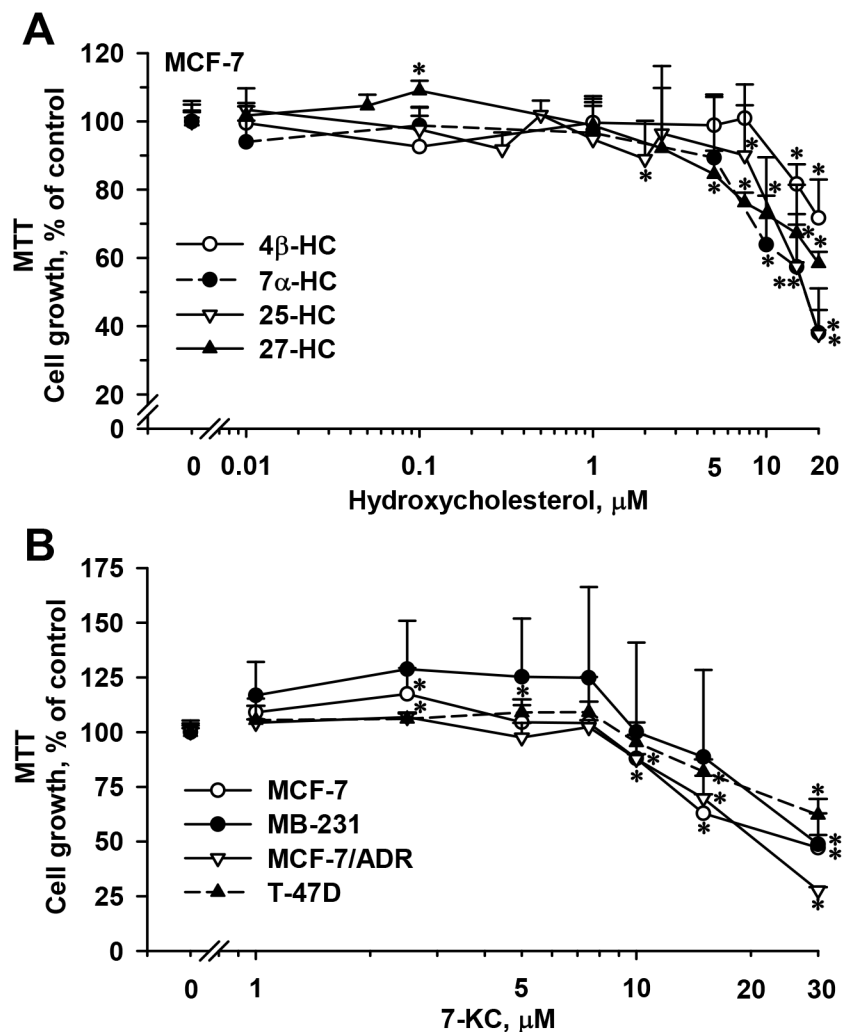

**Supplementary Figure 1: Effects of oxysterols on cell growth in breast cancer cell lines.** Cell growth was monitored by determining mitochondrial MTT reduction activity. Cells were exposed to oxysterols in 2% FBS-supplemented medium for 48 h. Panel (A) shows the effects of hydroxycholesterols (HCs) on the growth of MCF-7 cells and panel (B) shows the effects of 7-ketocholesterol (7-KC) on the growth of MCF-7, MB-231, MCF-7/ADR, and T-47D cells. The results are presented as means  $\pm$  SD of three independent experiments with three determinations within each experiment. \* $p < 0.05$ .

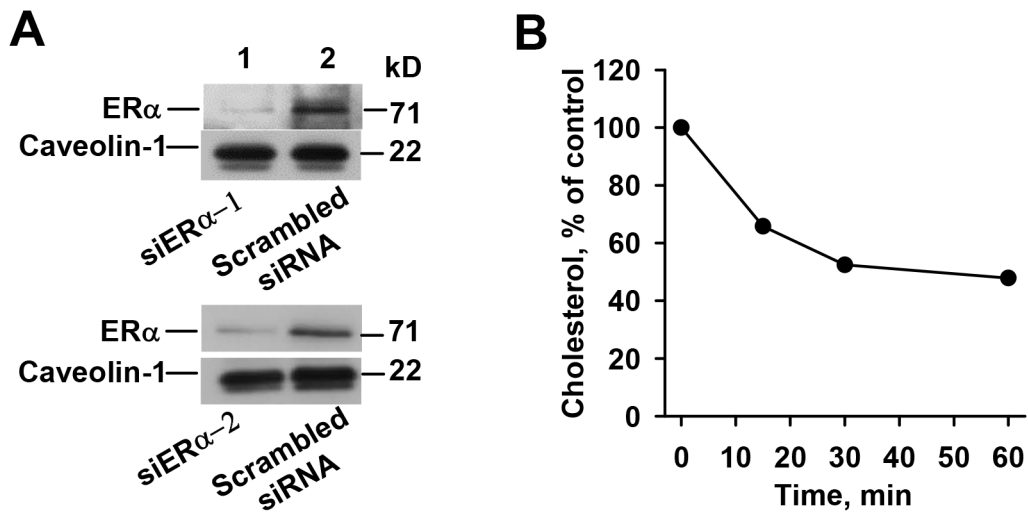

**Supplementary Figure 2:** The effect of ERα knockdown and methyl-β-cyclodextrin on ERα expression (A) and cholesterol level (B) in MCF-7 cells, respectively. Panel A shows the representative blot (30 μg crude membrane protein/well) of the immunoblotting analysis of cellular ER protein after transfection with ERα siRNA. Panel B shows the relative cellular cholesterol levels in cells exposed to 10 mM methyl-β-cyclodextrin at 37°C for increasing time-periods.
